# Supplementary material for: Inhibition of triosephosphate isomerase by phosphoenolpyruvate in the feedback-regulation of glycolysis
Source: PubMed Central journal article supplement (PMC3971408; doi:10.1098/rsob.130232), 2014-03-05
Supplement: rsob130232supp2.pdf [file rsob130232supp2.pdf]

**The inhibition of triosephosphate isomerase by phosphoenolpyruvate in the feedback-regulation of glycolysis**

Supplementary Figures

S1

|        | catalytically active sites                  | mutated sites | difference human-rabbit                   |
|--------|---------------------------------------------|---------------|-------------------------------------------|
| human  | APSRKFFVGGNW                                | K             | MNNGRQKSLGELIGTLNAAKVPADTEVVCAPPTAYIDF 50 |
| rabbit | APSRKFFVGGNW                                | K             | MNNGRKKNLGELITTLNAAKVPADTEVVCAPPTAYIDF 50 |
|        | *****:*****                                 |               |                                           |
| human  | ARQKLDPKIAVAAQ                              |               | NCYKVTNGAFTGEISPGMIKDCGATWVVLGH           |
| rabbit | ARQKLDPKIAVAAQ                              |               | NCYKVTNGAFTGEISPGMIKDCGATWVVLGH           |
|        | *****                                       |               |                                           |
| human  | VFGESDELIGQKVAHAL                           | A             | EGLGVIACIGEKLDEREAGITEKVVFEQTKVI 150      |
| rabbit | VFGESDELIGQKVAHAL                           | S             | EGLGVIACIGEKLDEREAGITEKVVFEQTKVI 150      |
|        | *****:*****                                 |               |                                           |
| human  | ADNVKDWSKVVLAY                              | E             | PVWAI                                     |
| rabbit | ADNVKDWSKVVLAY                              | E             | PVWAI                                     |
|        | *****                                       |               |                                           |
| human  | AQSTRIIYGGSVTGATCKELASQPDVDGFLVGGASLKPEFVDI |               | INAKQ 248                                 |
| rabbit | AQSTRIIYGGSVTGATCKELASQPDVDGFLVGGASLKPEFVDI |               | INAKQ 248                                 |
|        | *****                                       |               |                                           |

**Fig S1: Alignment of human and rabbit TPI, as well as overview of catalytic and mutant residues**

The alignment of human TPI (Swiss-Prot: P60174) and rabbit TPI (Swiss-Prot: P00939) amino acid sequences was generated with an EMBL-EBI clustalW. The catalytically active residues are highlighted in green and the residues that were experimentally exchanged are indicated in purple. Human and Rabbit TPI are virtually identical, and differ in four non-catalytic residues.

S2

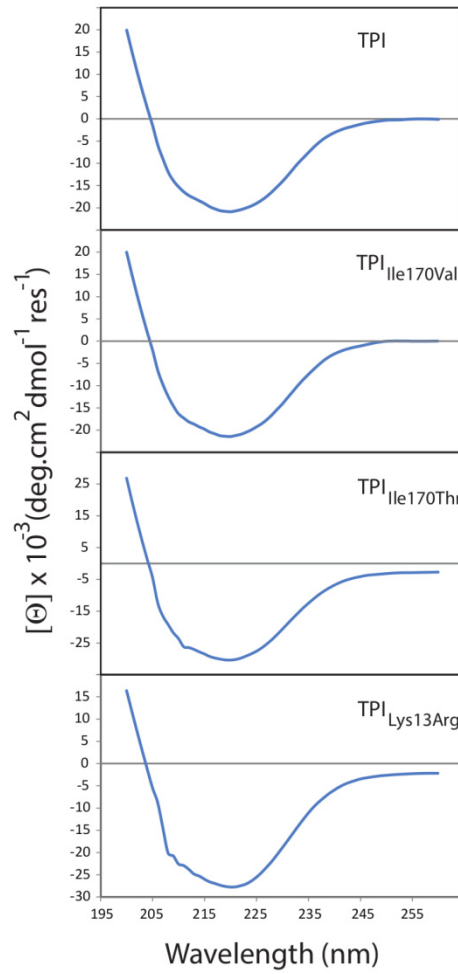

**Fig S2: Far UV-Circular Dichroism spectra for purified TPI, TPI<sub>Ile170Val</sub>, TPI<sub>Ile170Thr</sub> and TPI<sub>Lys13Arg</sub>**

The secondary structures of the four purified proteins were measured in 20 mM HEPES buffer, pH 7.5. The CD spectra indicate similar secondary structure composition of TPI enzymes, indicating correct folding of the TPI mutants.

S3

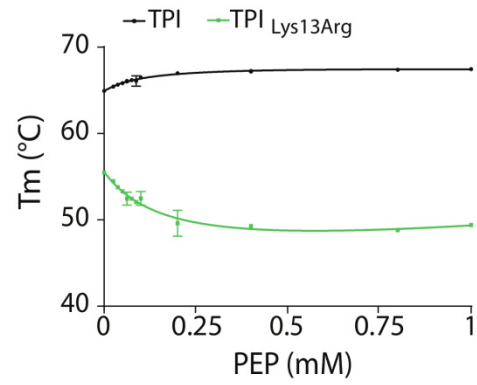

**Fig S3: TPI<sub>Lys13Arg</sub> is thermally unstable.**

Thermal melt assays upon adding increased concentrations of PEP to wild-type TPI and TPI<sub>Lys13Arg</sub>. TPI<sub>Lys13Arg</sub> was thermally unstable, and PEP further destabilized the mutant enzyme.

## S4

|                          | G6P    |      | F6P   |       | F1,6BP |       | DHAP   |       |
|--------------------------|--------|------|-------|-------|--------|-------|--------|-------|
|                          | AVR    | STD  | AVR   | STD   | AVR    | STD   | AVR    | STD   |
| TPI                      | 106.75 | 5.30 | 75.38 | 25.55 | 223.63 | 21.97 | 33.57  | 29.41 |
| TPI <sub>Ile170Val</sub> | 84.64  | 6.42 | 40.90 | 2.83  | 260.59 | 25.80 | 107.15 | 31.22 |
| TPI <sub>Ile170Thr</sub> | 78.05  | 5.81 | 72.58 | 20.67 | 252.67 | 16.49 | 76.15  | 34.93 |

  

|                          | G3P  |      | 2,3-PG |      | PEP  |      | Pyr   |       |
|--------------------------|------|------|--------|------|------|------|-------|-------|
|                          | AVR  | STD  | AVR    | STD  | AVR  | STD  | AVR   | STD   |
| TPI                      | 7.15 | 1.27 | 20.03  | 1.85 | 2.13 | 0.30 | 90.93 | 15.01 |
| TPI <sub>Ile170Val</sub> | 4.31 | 0.76 | 17.38  | 4.61 | 1.60 | 0.29 | 83.40 | 5.58  |
| TPI <sub>Ile170Thr</sub> | 7.74 | 0.66 | 19.41  | 2.41 | 1.44 | 0.40 | 87.80 | 12.52 |

  

|                          | 6PG  |      | R5P  |      | R15P + X5P |      | S7P    |       |
|--------------------------|------|------|------|------|------------|------|--------|-------|
|                          | AVR  | STD  | AVR  | STD  | AVR        | STD  | AVR    | STD   |
| TPI                      | 5.82 | 0.80 | 1.31 | 0.25 | 3.23       | 1.08 | 76.98  | 10.45 |
| TPI <sub>Ile170Val</sub> | 7.30 | 2.89 | 1.95 | 0.31 | 4.96       | 1.34 | 82.48  | 20.36 |
| TPI <sub>Ile170Thr</sub> | 9.94 | 1.27 | 1.64 | 0.59 | 5.14       | 1.69 | 100.73 | 13.13 |

**G6P**, glucose 6-phosphate, **F6P**, fructose 6-phosphate, **F1,6BP**, fructose 1,6-phosphate, **DHAP**, Dihydroxyacetone phosphate, **G3P**, glyceraldehyde 3-phosphate, 2,3-PG, 2-phosphoglycerate + 3-phosphoglycerate, **PEP**, phosphoenolpyruvate, **Pyr**, pyruvate, **6PG**, 6-phosphogluconate, **R5P**, ribose 5-phosphate, **R15P + X5P**, ribulose 5-phosphate + xylulose 5-phosphate, **S7P**, seduheptulose 7-phosphate, **AVR**, average, **STD**, standard deviation. Concentrations are given in  $\mu\text{M}$  in a 100  $\mu\text{l}$  cell extract.

### Fig S4: Absolute concentrations

Glycolytic and PPP intermediate concentrations as determined by LC-SRM in yeast extracts expressing human wild-type TPI, TPI<sub>Ile170Val</sub> or TPI<sub>Ile170Thr</sub> in micromol / ml\*OD<sub>600</sub>; n=3
